# Supplementary material for: Toll-like receptor 9 protects non-immune cells from stress by modulating mitochondrial ATP synthesis through the inhibition of SERCA2
Source: PubMed Central journal article supplement (PMC3989675; doi:10.1002/embr.201337945), 2014-03-07

Fig. 1A

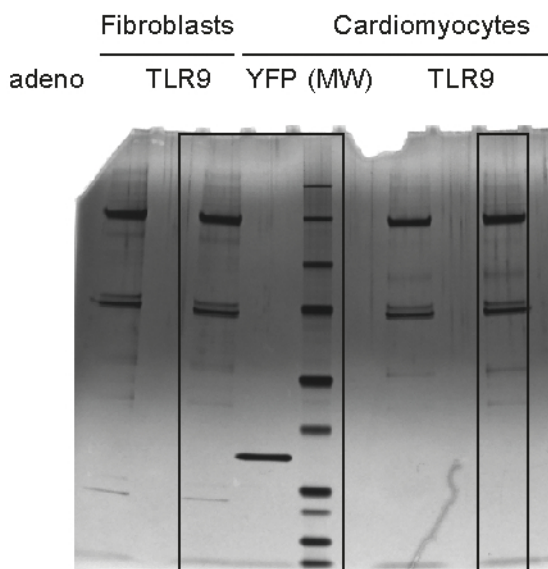

Fig. 1B

Cardiomyocytes  
CpG 0 15 min

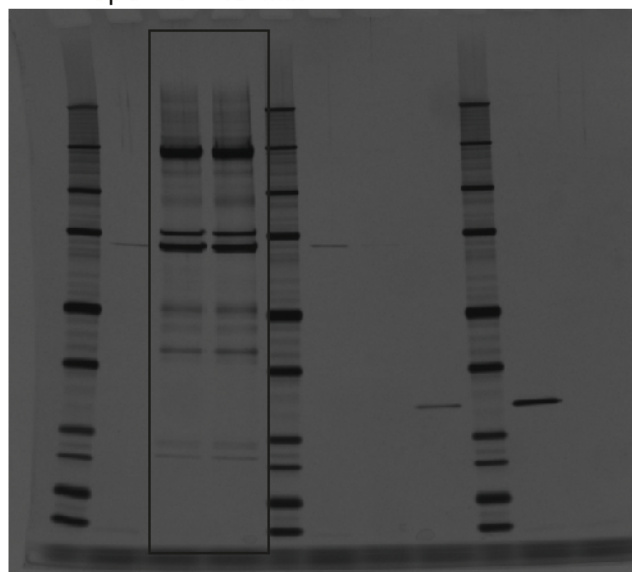

Supplement: 41586_2014_BFEMBR201337945_MOESM6_ESM.pdf [file 41586_2014_BFEMBR201337945_MOESM6_ESM.pdf]
